# Supplementary material
Source: PubMed Central journal article supplement (PMC516802)
Supplement: 1472-6807-4-4-S1.pdf [file 1472-6807-4-4-S1.pdf]

| RZPD Clone ID | Domain  | Protein ID | start residue | end residue |
|---------------|---------|------------|---------------|-------------|
| PSFEp758D0925 | CNH     | AAB48435.1 | 506           | 826         |
| PSFEp758H0924 | CNH     | AAB48435.1 | 506           | 831         |
| PSFEp758F0925 | CNH     | AAB48435.1 | 511           | 826         |
| PSFEp758B0925 | CNH     | AAB48435.1 | 511           | 831         |
| PSFEp758C0525 | DCX     | AAC31696.1 | 43            | 139         |
| PSFEp758E0425 | DCX     | AAC31696.1 | 43            | 144         |
| PSFEp758G0325 | DCX     | AAC31696.1 | 43            | 263         |
| PSFEp758E0325 | DCX     | AAC31696.1 | 43            | 268         |
| PSFEp758C0625 | DCX     | AAC31696.1 | 48            | 139         |
| PSFEp758A0525 | DCX     | AAC31696.1 | 48            | 144         |
| PSFEp758C0425 | DCX     | AAC31696.1 | 48            | 263         |
| PSFEp758A0425 | DCX     | AAC31696.1 | 48            | 268         |
| PSFEp758E0525 | DCX     | AAC31696.1 | 170           | 263         |
| PSFEp758G0425 | DCX     | AAC31696.1 | 170           | 268         |
| PSFEp758E0625 | DCX     | AAC31696.1 | 175           | 263         |
| PSFEp758G0525 | DCX     | AAC31696.1 | 175           | 268         |
| PSFEp758B0626 | eIF5C   | AAC02903.2 | 1487          | 1579        |
| PSFEp758H0825 | eIF5C   | AAC02903.2 | 1487          | 1583        |
| PSFEp758F0226 | eIF5C   | AAC02903.2 | 1492          | 1579        |
| PSFEp758D0426 | eIF5C   | AAC02903.2 | 1492          | 1583        |
| PSFEp758D0526 | FAF     | AAH02801.1 | 171           | 270         |
| PSFEp758H0925 | FAF     | AAH02801.1 | 171           | 368         |
| PSFEp758H1025 | FAF     | AAH02801.1 | 176           | 270         |
| PSFEp758F0326 | FAF     | AAH02801.1 | 176           | 275         |
| PSFEp758B0726 | FAF     | AAH02801.1 | 176           | 368         |
| PSFEp758F0426 | G_patch | AAA99715.1 | 736           | 787         |
| PSFEp758B0826 | G_patch | AAA99715.1 | 736           | 792         |
| PSFEp758F0826 | G_patch | AAA99715.1 | 741           | 787         |
| PSFEp758D0626 | G_patch | AAA99715.1 | 741           | 792         |
| PSFEp758D1026 | G_patch | AAH07871.1 | 228           | 279         |
| PSFEp758A0226 | G_patch | AAH07871.1 | 228           | 284         |
| PSFEp758F1226 | G_patch | AAH07871.1 | 233           | 279         |
| PSFEp758B1226 | G_patch | AAH07871.1 | 233           | 284         |
| PSFEp758D0226 | G_patch | CAA68976.1 | 92            | 142         |
| PSFEp758B0426 | G_patch | CAA68976.1 | 92            | 147         |
| PSFEp758A0626 | G_patch | CAA68976.1 | 97            | 142         |
| PSFEp758F1126 | G_patch | CAA68976.1 | 97            | 147         |
| PSFEp758C0126 | G_patch | CAD38742.1 | 406           | 459         |
| PSFEp758A0326 | G_patch | CAD38742.1 | 406           | 464         |
| PSFEp758F0926 | G_patch | CAD38742.1 | 411           | 459         |
| PSFEp758D1126 | G_patch | CAD38742.1 | 411           | 464         |

| RZPD Clone ID | Domain   | Protein ID | start residue | end residue |
|---------------|----------|------------|---------------|-------------|
| PSFEp758C0725 | JAB_MPN  | AAD03465.1 | 33            | 172         |
| PSFEp758A0725 | JAB_MPN  | AAD03465.1 | 33            | 177         |
| PSFEp758G0725 | JAB_MPN  | AAD03465.1 | 38            | 172         |
| PSFEp758E0725 | JAB_MPN  | AAD03465.1 | 38            | 177         |
| PSFEp758F1125 | JAB_MPN  | AAD03468.1 | 54            | 191         |
| PSFEp758F0526 | L27      | AAG34117.1 | 13            | 68          |
| PSFEp758D0726 | L27      | AAG34117.1 | 13            | 73          |
| PSFEp758B0825 | MA3      | AAC02903.2 | 1215          | 1332        |
| PSFEp758A0825 | MA3      | AAC02903.2 | 1215          | 1337        |
| PSFEp758G0825 | MA3      | AAC02903.2 | 1220          | 1332        |
| PSFEp758E0825 | MA3      | AAC02903.2 | 1220          | 1337        |
| PSFEp758H1124 | OSTEO    | AAA59974.1 | 14            | 314         |
| PSFEp758B1125 | OSTEO    | AAA59974.1 | 19            | 314         |
| PSFEp758C1026 | PINT     | AAB58732.1 | 316           | 404         |
| PSFEp758A0126 | PINT     | AAB58732.1 | 316           | 409         |
| PSFEp758E0826 | PINT     | AAB58732.1 | 321           | 404         |
| PSFEp758A1226 | PINT     | AAB58732.1 | 321           | 409         |
| PSFEp758D0826 | PRY      | AAA36564.1 | 310           | 367         |
| PSFEp758H0125 | PRY      | AAA36564.1 | 310           | 372         |
| PSFEp758F0626 | PRY      | AAA36564.1 | 315           | 367         |
| PSFEp758B1026 | PRY      | AAA36564.1 | 315           | 372         |
| PSFEp758D1225 | RWD      | CAB52345.1 | 8             | 134         |
| PSFEp758H1224 | RWD      | CAB52345.1 | 8             | 140         |
| PSFEp758F1225 | RWD      | CAB52345.1 | 13            | 134         |
| PSFEp758B1225 | RWD      | CAB52345.1 | 13            | 140         |
| PSFEp758A0325 | SPRY     | AAA36564.1 | 363           | 493         |
| PSFEp758E0225 | SPRY     | AAA36564.1 | 363           | 498         |
| PSFEp758C0325 | SPRY     | AAA36564.1 | 368           | 493         |
| PSFEp758G0225 | SPRY     | AAA36564.1 | 368           | 498         |
| PSFEp758D1025 | TLDC     | BAB13435.1 | 255           | 429         |
| PSFEp758H1024 | TLDC     | BAB13435.1 | 255           | 434         |
| PSFEp758F1025 | TLDC     | BAB13435.1 | 260           | 429         |
| PSFEp758B1025 | TLDC     | BAB13435.1 | 260           | 434         |
| PSFEp758H0925 | UBX      | AAH02801.1 | 171           | 368         |
| PSFEp758B0726 | UBX      | AAH02801.1 | 176           | 368         |
| PSFEp758D1226 | ZnF_C3H1 | AAF28981.1 | 126           | 157         |
| PSFEp758A0426 | ZnF_C3H1 | AAF28981.1 | 126           | 162         |
| PSFEp758E1126 | ZnF_C3H1 | AAF28981.1 | 131           | 157         |
| PSFEp758C0226 | ZnF_C3H1 | AAF28981.1 | 131           | 162         |
| PSFEp758F0726 | ZnF_RBZ  | CAC28312.1 | 185           | 214         |
| PSFEp758H0224 | Zpr1     | AAC33514.1 | 44            | 207         |

| RZPD Clone ID | Domain | Protein ID | start residue | end residue |
|---------------|--------|------------|---------------|-------------|
| PSFEp758B0125 | Zpr1   | AAC33514.1 | 44            | 212         |
| PSFEp758C0225 | Zpr1   | AAC33514.1 | 49            | 207         |
| PSFEp758F0125 | Zpr1   | AAC33514.1 | 49            | 212         |
| PSFEp758D0125 | Zpr1   | AAC33514.1 | 252           | 416         |
| PSFEp758H0124 | Zpr1   | AAC33514.1 | 252           | 421         |
| PSFEp758B0225 | Zpr1   | AAC33514.1 | 257           | 416         |
